# Supplementary material
Source: PubMed Central journal article supplement (PMC7965737)
Supplement: NIHMS1676509-supplement-Supplementary_Material.pdf [file NIHMS1676509-supplement-Supplementary_Material.pdf]

## SUPPORTING INFORMATION

# Targeting Triple Negative Breast Cancer Cells with Novel Cytotoxic Peptide-Doxorubicin Conjugates

Elmira Ziaei,<sup>1</sup> Azam Saghaeidehkordi,<sup>1</sup> Cassandra Dill,<sup>1</sup> Innokentiy Maslennikov,<sup>1</sup> Shiuan Chen,<sup>2</sup>  
and Kamaljit Kaur\*,<sup>1</sup>

<sup>1</sup>Chapman University School of Pharmacy (CUSP), Harry and Diane Rinker Health Science  
Campus, Chapman University, Irvine, California, 92618-1908, USA

<sup>2</sup>Department of Cancer Biology, Beckman Research Institute of the City of Hope, Duarte,  
California, 91010, USA

### **Table of Contents**

|                                                                                                                                                                                                                              |       |
|------------------------------------------------------------------------------------------------------------------------------------------------------------------------------------------------------------------------------|-------|
| <b>Figure S1.</b> (a) Proton ( <sup>1</sup> H) NMR spectra for MCC-Dox in DMSO-d <sub>6</sub> . (b) Chemical shift assignments for MCC-Dox for the proton and carbon NMR spectra made using the HSQC and HMBC experiments.   | S2-S3 |
| <b>Figure S2.</b> RP-HPLC chromatograms for (a) MCC-DOX and (b) peptide.                                                                                                                                                     | S4-S5 |
| <b>Figure S3.</b> (a) RP-HPLC chromatogram of peptide-Dox conjugate <b>1</b> . Also shown are the (b) Q-TOF and (c) MALDI-TOF mass spectra for the conjugate.                                                                | S5-S6 |
| <b>Figure S4.</b> RP-HPLC chromatogram of conjugate <b>2</b> .                                                                                                                                                               | S6-S7 |
| <b>Figure S5.</b> RP-HPLC chromatogram and mass spectrum (Q-TOF) of the aliquot (at 48 h) taken during acid stability experiment of conjugate <b>1</b> .                                                                     | S7    |
| <b>Figure S6.</b> The stability of conjugate <b>1</b> in human serum at 37 °C. MALDI-TOF mass spectrometry analysis of conjugate <b>1</b> after incubation with human serum.                                                 | S8    |
| <b>Figure S7.</b> The stability of conjugate <b>2</b> in aqueous acidic solution pH 5 at 37 °C (a) and acetonitrile/water (10%) at -20 °C (b). An aliquot was taken at different time intervals for MALDI-TOF mass analysis. | S9    |

(a)

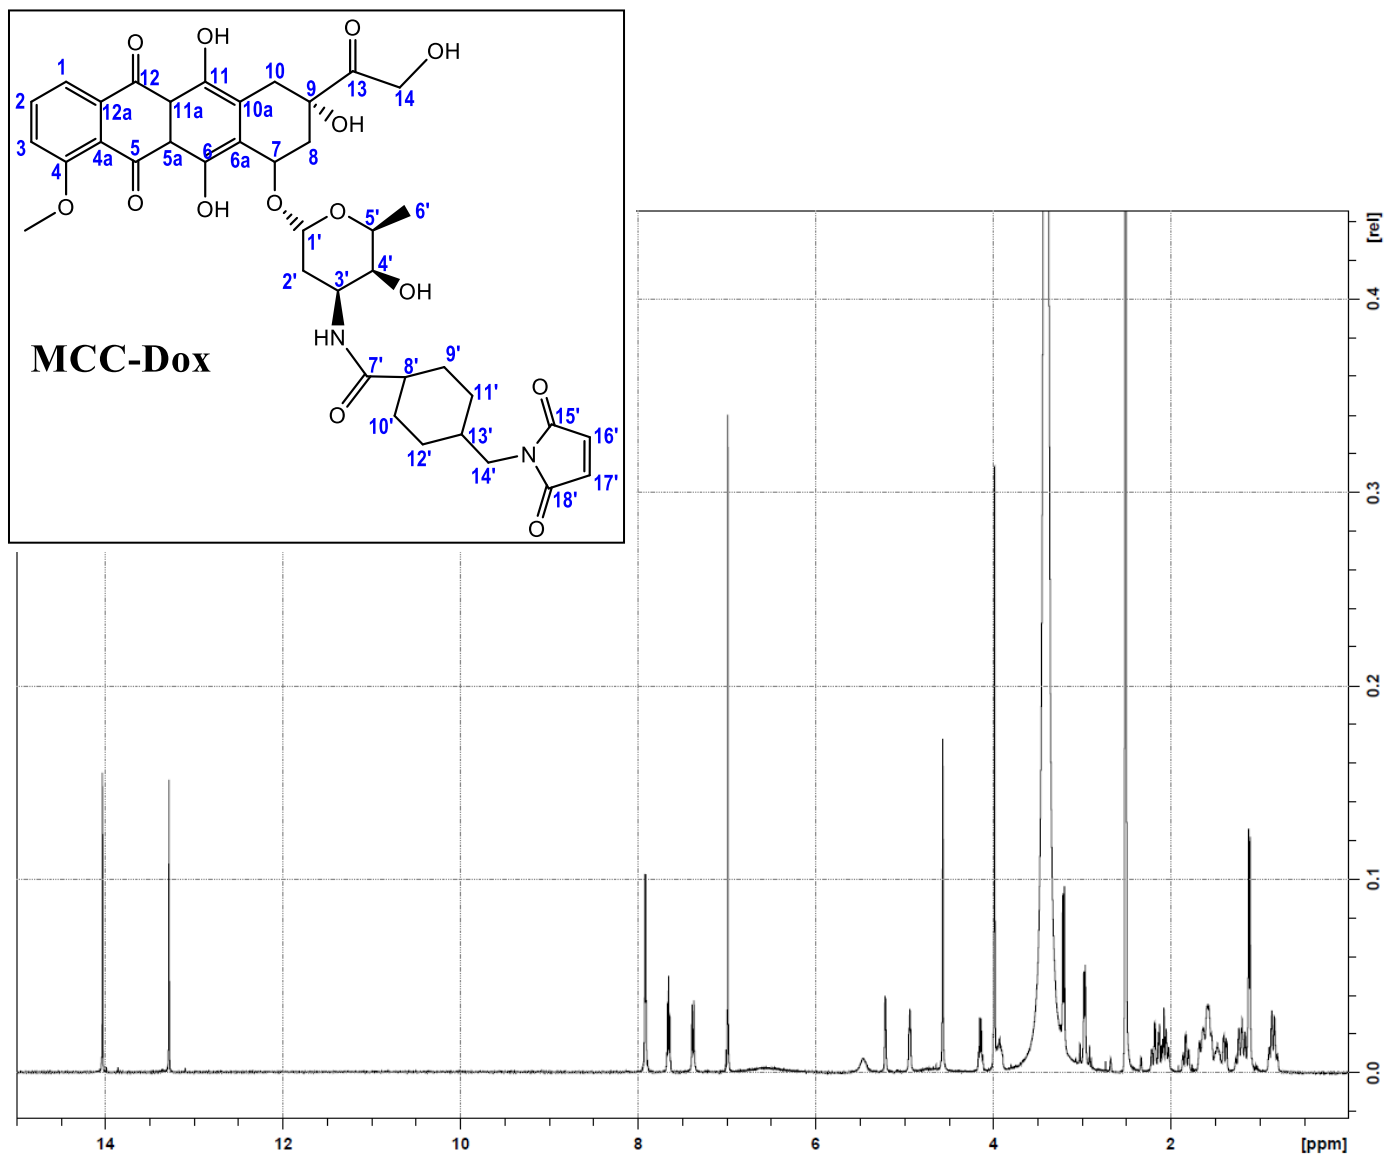

(b)

| <sup>1</sup> H NMR |                |               |
|--------------------|----------------|---------------|
| Number             | Chemical Shift | Proton        |
| 11-OH              | 14.03          |               |
| 6-OH               | 13.28          |               |
| 1 and 2            | 7.92           | 2H, m         |
| 3                  | 7.66           | 1H, m         |
| NH                 | 7.38           |               |
| 16' and 17'        | 6.99           | 2H, s         |
| 1'                 | 5.22           | 1H, dd        |
| 7                  | 4.94           | 1H, dd        |
| 14                 | 4.57           | 2H, s         |
| 5'                 | 4.14           | 1H, m         |
| OMe                | 3.98           | 3H, s         |
| 3'                 | 3.93           | 1H, m         |
| 4'                 | 3.36           | 1H, m         |
| 14'                | 3.21           | 2H, d         |
| 10                 | 2.97           | 2H, dd        |
| DMSO               | 2.50           |               |
| 8                  | 2.14           | 2H, m         |
| 8'                 | 2.06           | 1H, m         |
| 2'                 | 1.83 and 1.39  | 2H, td and dd |
| 9' and 10'         | 1.66-1.55      | 4H, m         |
| 13'                | 1.48           | 1H, m         |
| 11' and 12'        | 1.21 and 0.845 | 4H, m         |
| 6'                 | 1.12           | 3H, d         |

| <sup>13</sup> C NMR |                |
|---------------------|----------------|
| Number              | Chemical Shift |
| 1                   | 118.9          |
| 2                   | 136.1          |
| 3                   | 119.6          |
| 4                   | 160.8          |
| 4a                  | 119.1          |
| 5                   | 186.5          |
| 5a                  | 110.6          |
| 6                   | 154.6          |
| 6a                  | 134.0          |
| 7                   | 70.0           |
| 8                   | 36.5           |
| 9                   | 75.0           |
| 10                  | 32.1           |
| 10a                 | 135.4          |
| 11                  | 156.0          |
| 11a                 | 110.8          |
| 12                  | 186.5          |
| 12a                 | 134.7          |
| 13 (C=O)            | 213.6          |
| 14                  | 63.55          |
| 1'                  | 100.0          |
| 2'                  | 29.5           |
| 3'                  | 44.6           |
| 4'                  | 68.1           |
| 5'                  | 66.7           |
| 6'                  | 16.9           |
| 7' (C=O)            | 174.1          |
| 8'                  | 43.1           |
| 9'                  | 28.3           |
| 10'                 | 29.1           |
| 11'                 | 28.1           |
| 12'                 | 29.24          |
| 13'                 | 35.8           |
| 14'                 | 42.8           |
| 15' and 18'         | 171.4          |
| 16' and 17'         | 134.3          |

**Figure S1.** (a) Proton (<sup>1</sup>H) NMR spectra for MCC-Dox in DMSO-d<sub>6</sub>. (b) Chemical shift assignments for MCC-Dox for the proton and carbon NMR spectra made using the HSQC and HMBC experiments.

(a)

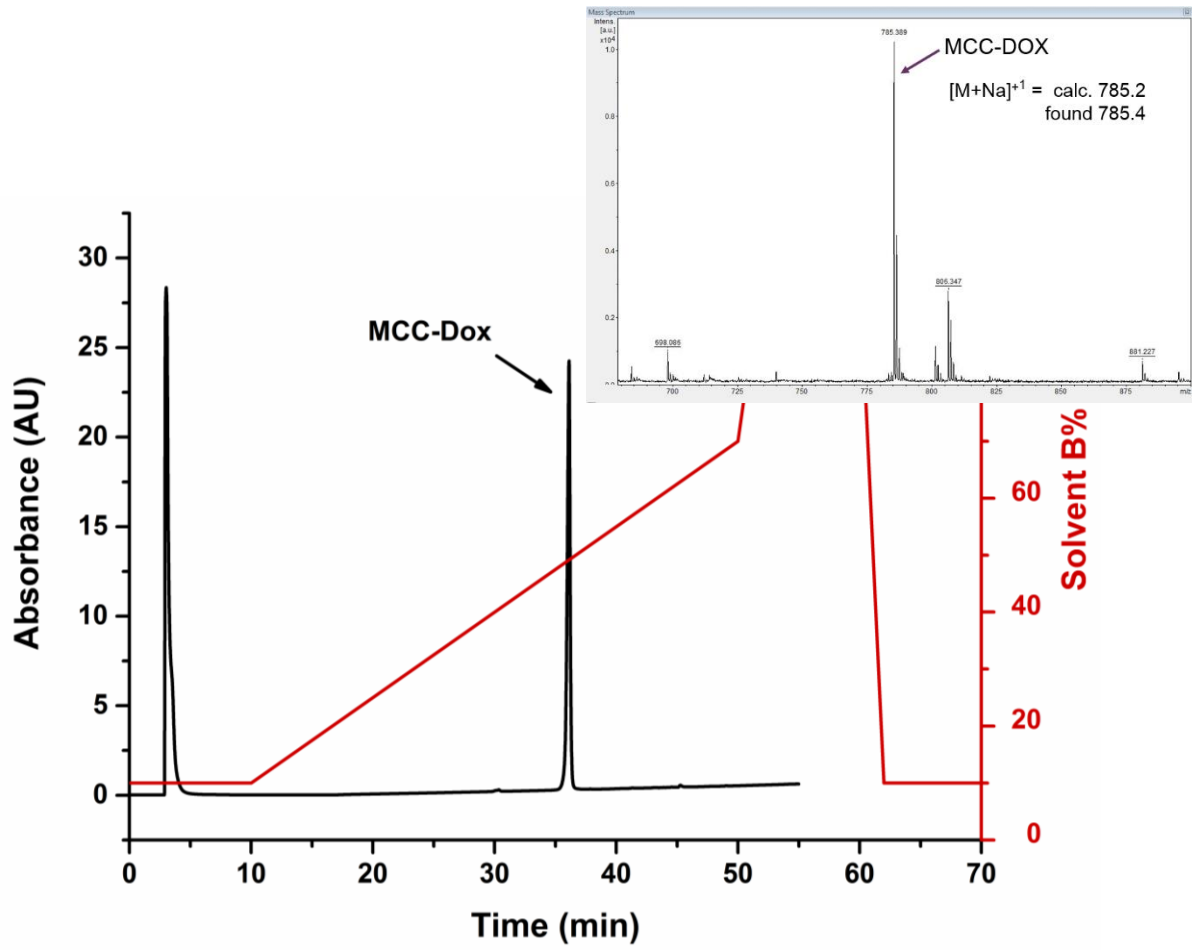

(b)

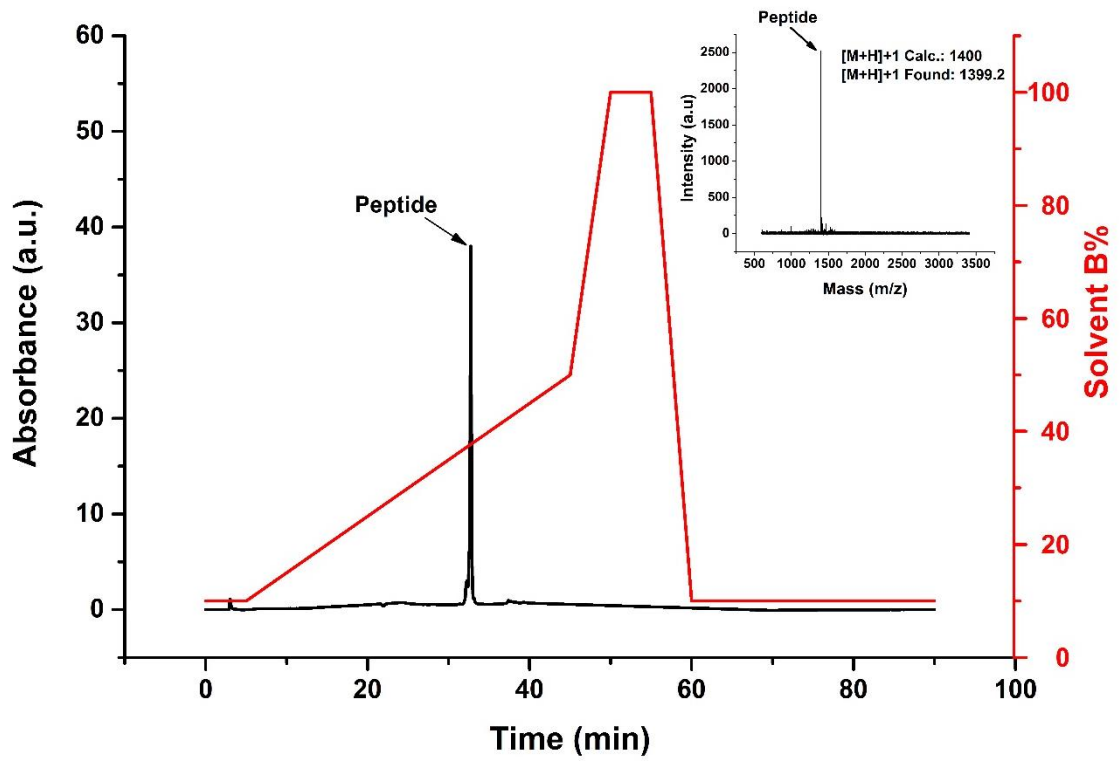

**Figure S2.** RP-HPLC chromatograms for (a) MCC-DOX and (b) peptide. A gradient of acetonitrile/water (0.05% TFA) was used in different ratios over 50 min with a flow rate of 1 mL/min on Vydac C18 semi-preparative column. The inset shows MALDI-TOF mass spectra of each of them showing the  $[M+H]^+$  or  $[M+Na]^+$  as the major peak.

(a)

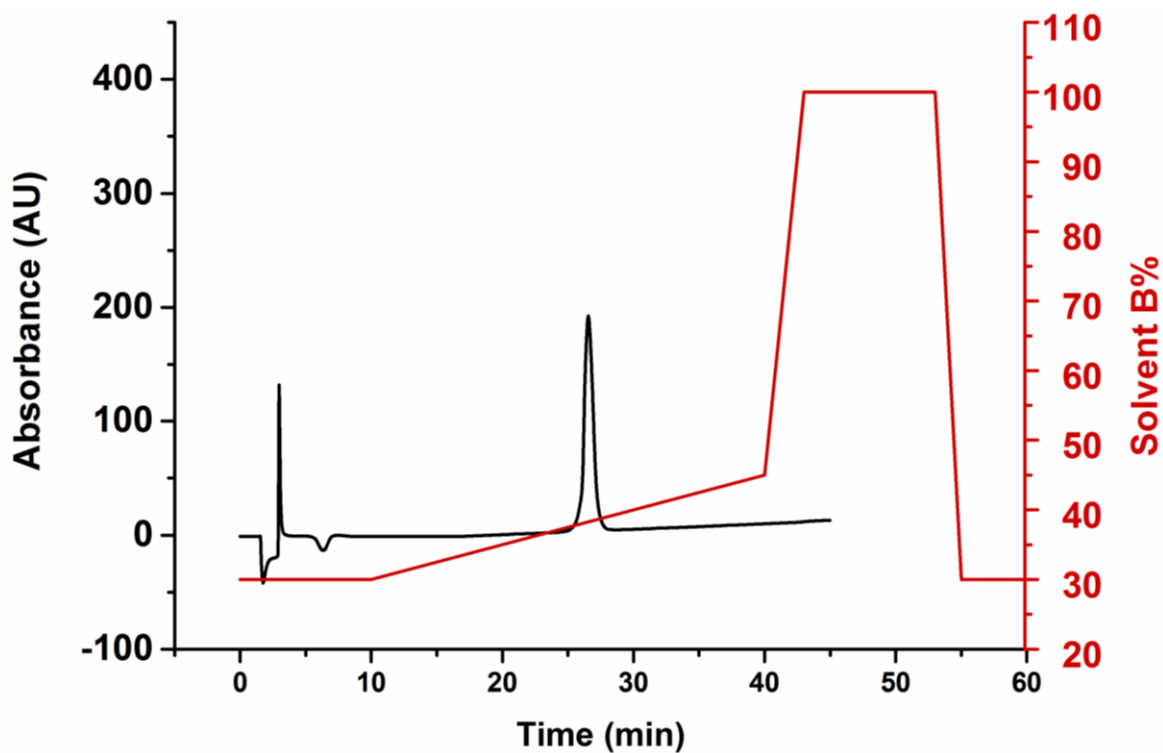

(b)

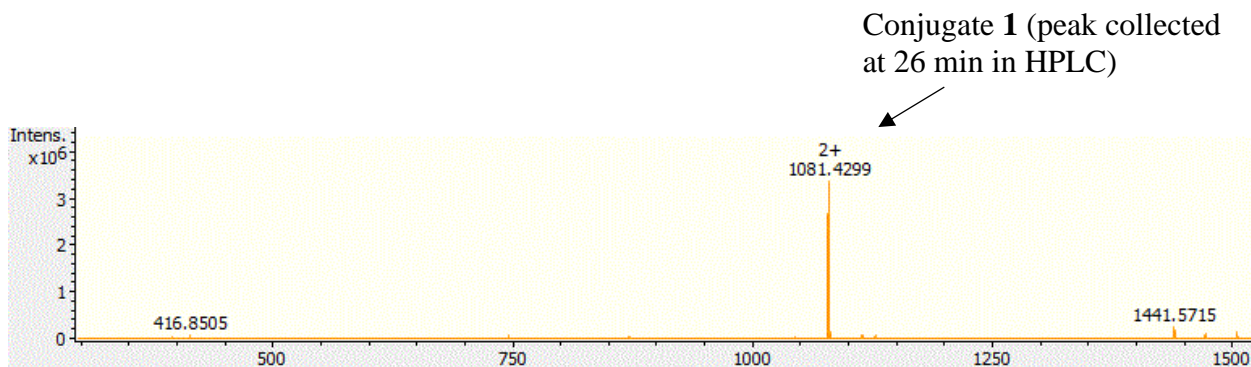

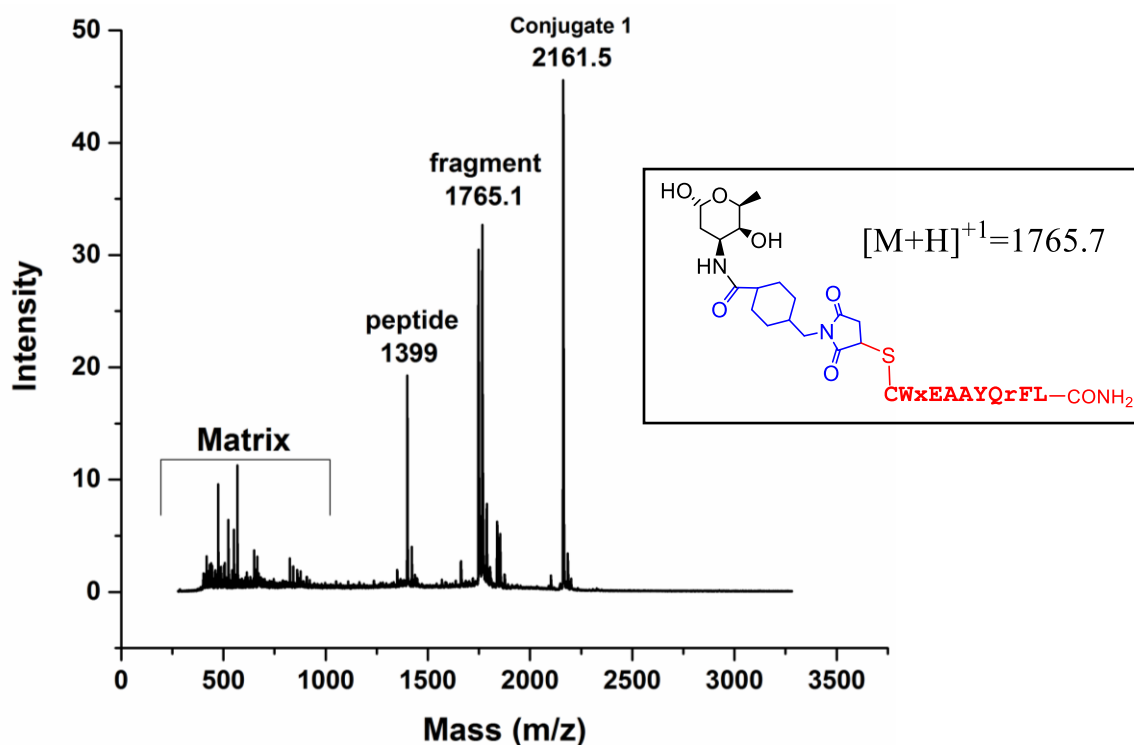

**Figure S3.** (a) RP-HPLC chromatogram of peptide-Dox conjugate **1**. Also shown are the MALDI-TOF (b) and Q-TOF (c) mass spectra for the conjugate showing the  $[M+H]^+1$  as 2161.5 (calcd.  $M+H$  2161.9) or  $(1081.43-1)*2 = 2160.86$  (calcd  $M$  2160.9) as the major peak. A gradient of acetonitrile/water (0.05% TFA) was used in different ratios over 50 min with a flow rate of 1 mL/min on Vydac C18 semi-preparative column.

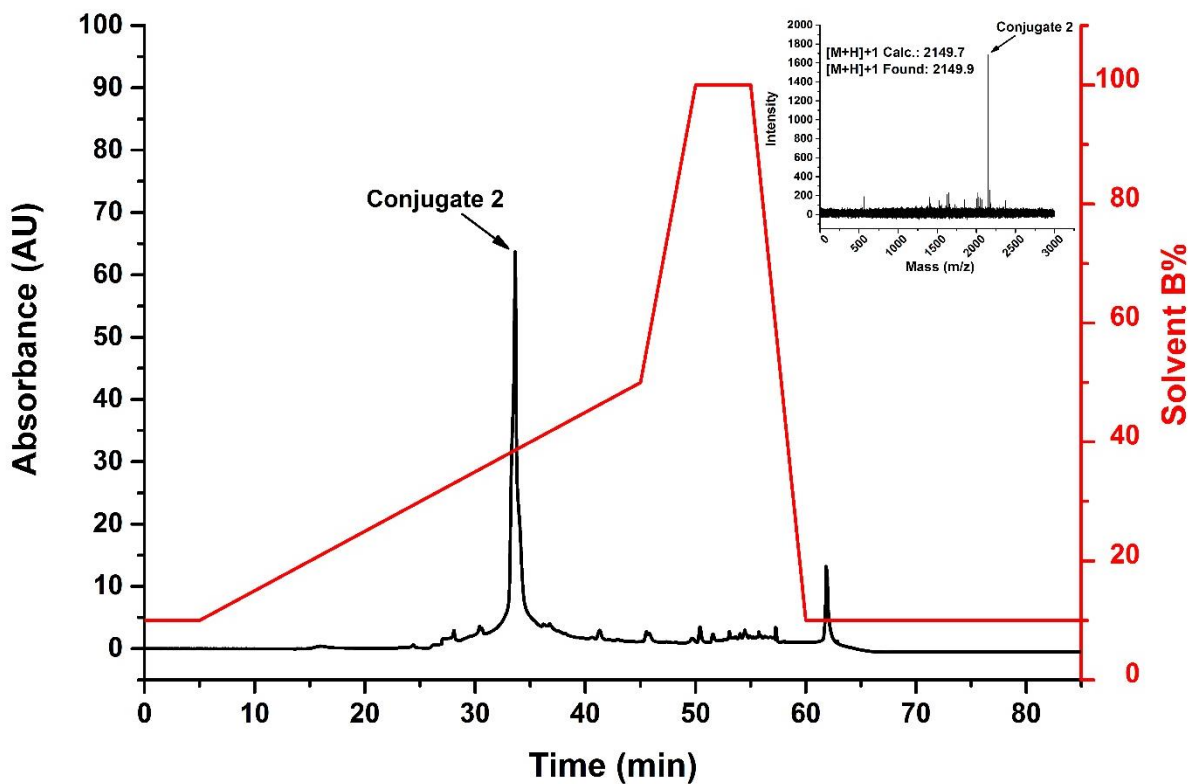

**Figure S4.** RP-HPLC chromatogram of conjugate **2**. A gradient of acetonitrile/water (0.05% TFA) was used in different ratios over 50 min with a flow rate of 1 mL/min on Vydac C18 analytical column. The inset shows MALDI-TOF mass spectrum showing the  $[M+H]^+$  as the major peak.

(a)

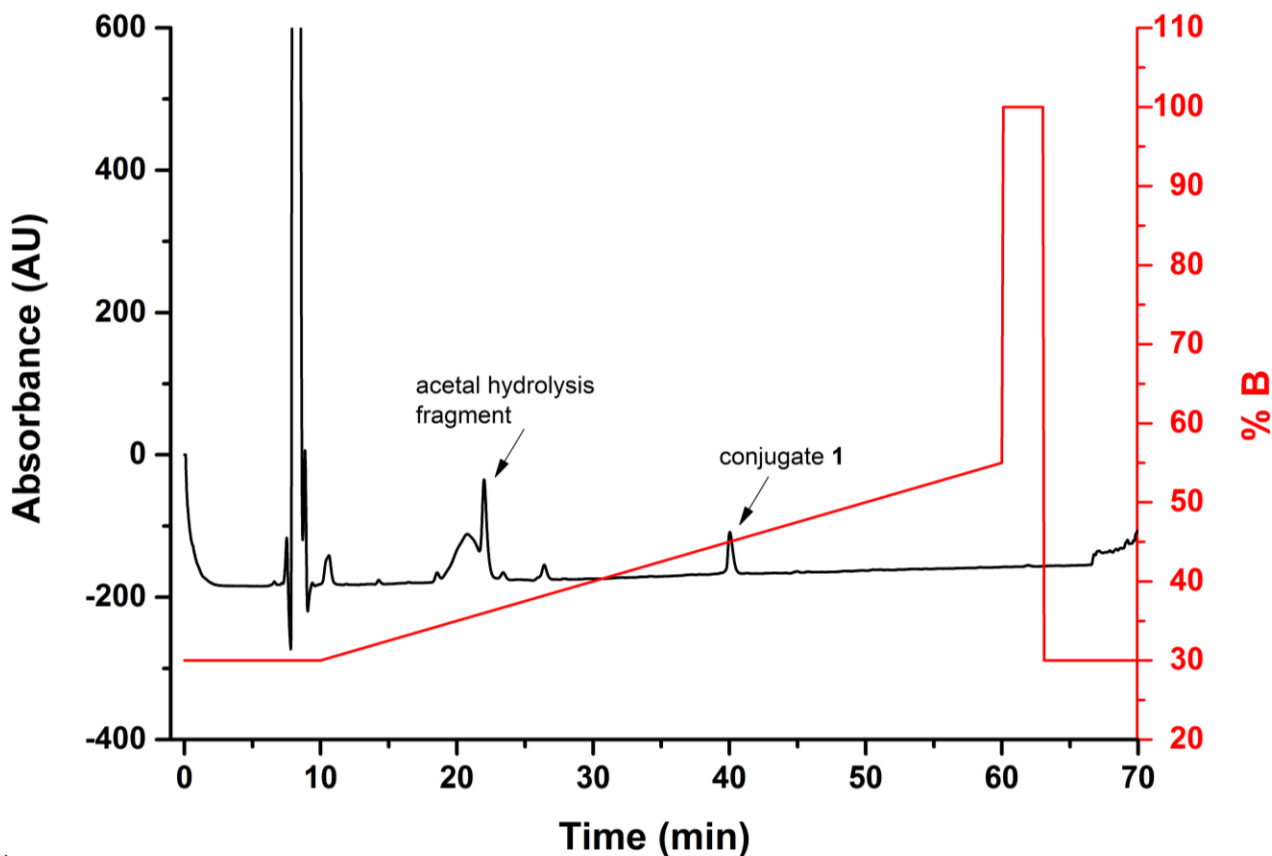

(b)

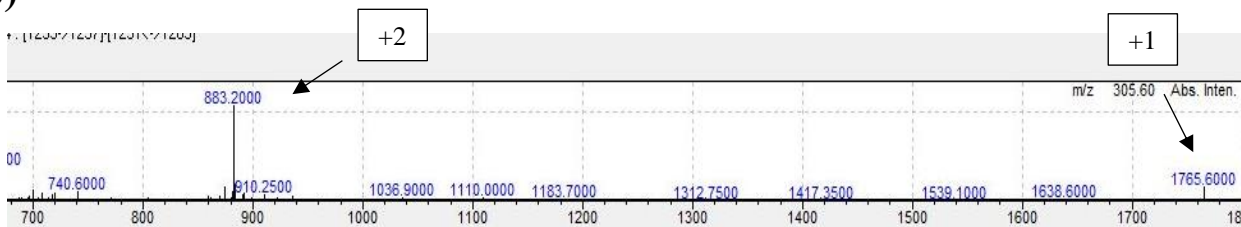

**Figure S5.** RP-HPLC chromatogram and mass spectrum (Q-TOF) of the aliquot (at 48 h) taken during acid stability experiment of conjugate **1**. (a) RP-HPLC chromatogram of aliquot at 48 h. A gradient of acetonitrile/water (0.05% TFA) was used in different ratios over 50 min with a flow rate of 1 mL/min on Vydac C18 semi-preparative column. (b) Q-TOF mass spectrum for the peak at 21 minutes in HPLC. The observed mass spec peak is 883.2 (+2 charge). This matches the calculated mass (1764.7) for the acid hydrolysis fragment i.e.  $(883.2-1)*2 = 1764.4$ .

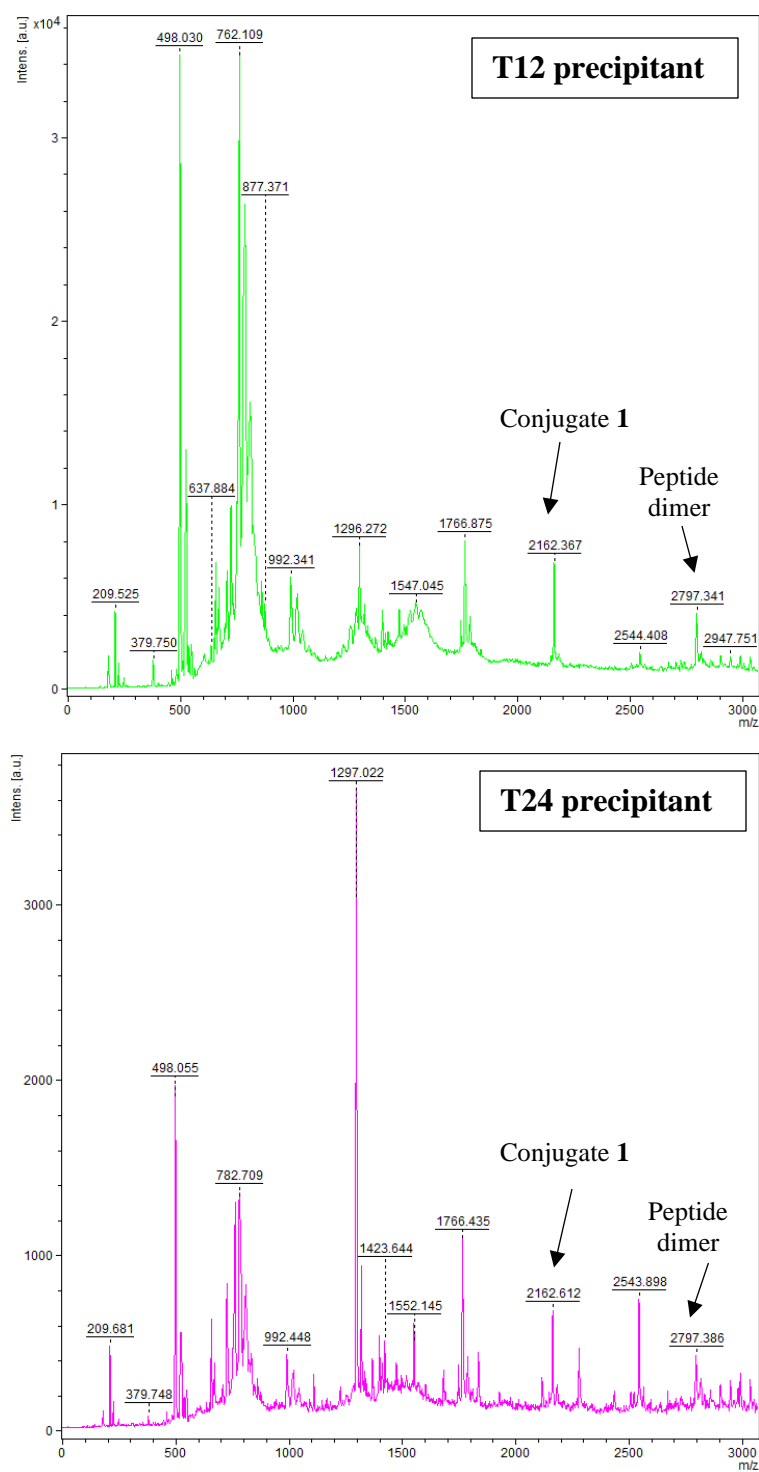

**Figure S6.** The stability of conjugate **1** in human serum at 37 °C. At different time intervals (0, 6, 12, and 24 hours), aliquots were removed and treated with methanol. Both the supernatant (see Figure 2b) and the precipitate were analyzed by RP-HPLC and MALDI-TOF to determine the fate of conjugate **1** in human serum. The MALDI-TOF of precipitate at 12 and 24 h are shown.



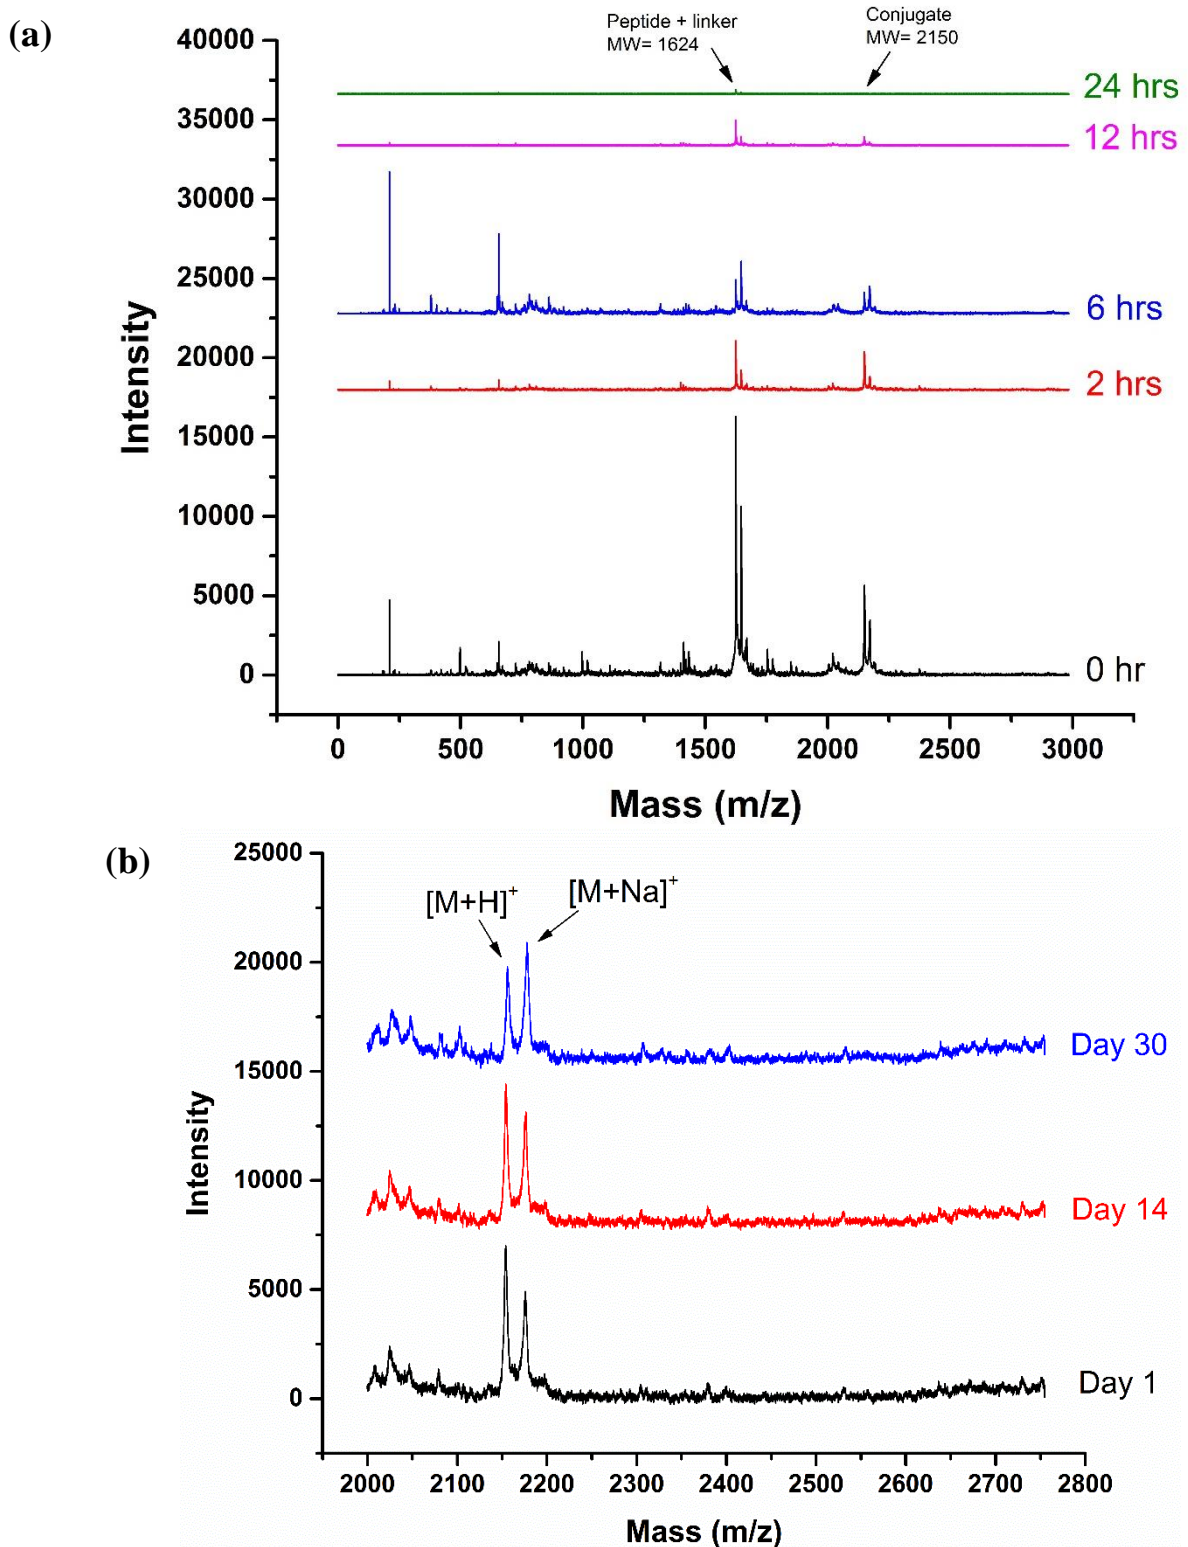

**Figure S7.** The stability of conjugate **2** in aqueous acidic solution pH 5 at 37 °C (a) and acetonitrile/water (9:1, v/v) at -20 °C (b). An aliquot was taken at different time intervals for MALDI-TOF mass analysis.
